# Supplementary figures and images for: Circumscribed choroidal haemangioma: clinical and topographical features
Source: PubMed Central journal article supplement — Br J Ophthalmol. 2019 Jan 2;103(10):1448–52. doi: 10.1136/bjophthalmol-2018-313388 (PMC6817701; doi:10.1136/bjophthalmol-2018-313388), 2019-01-02

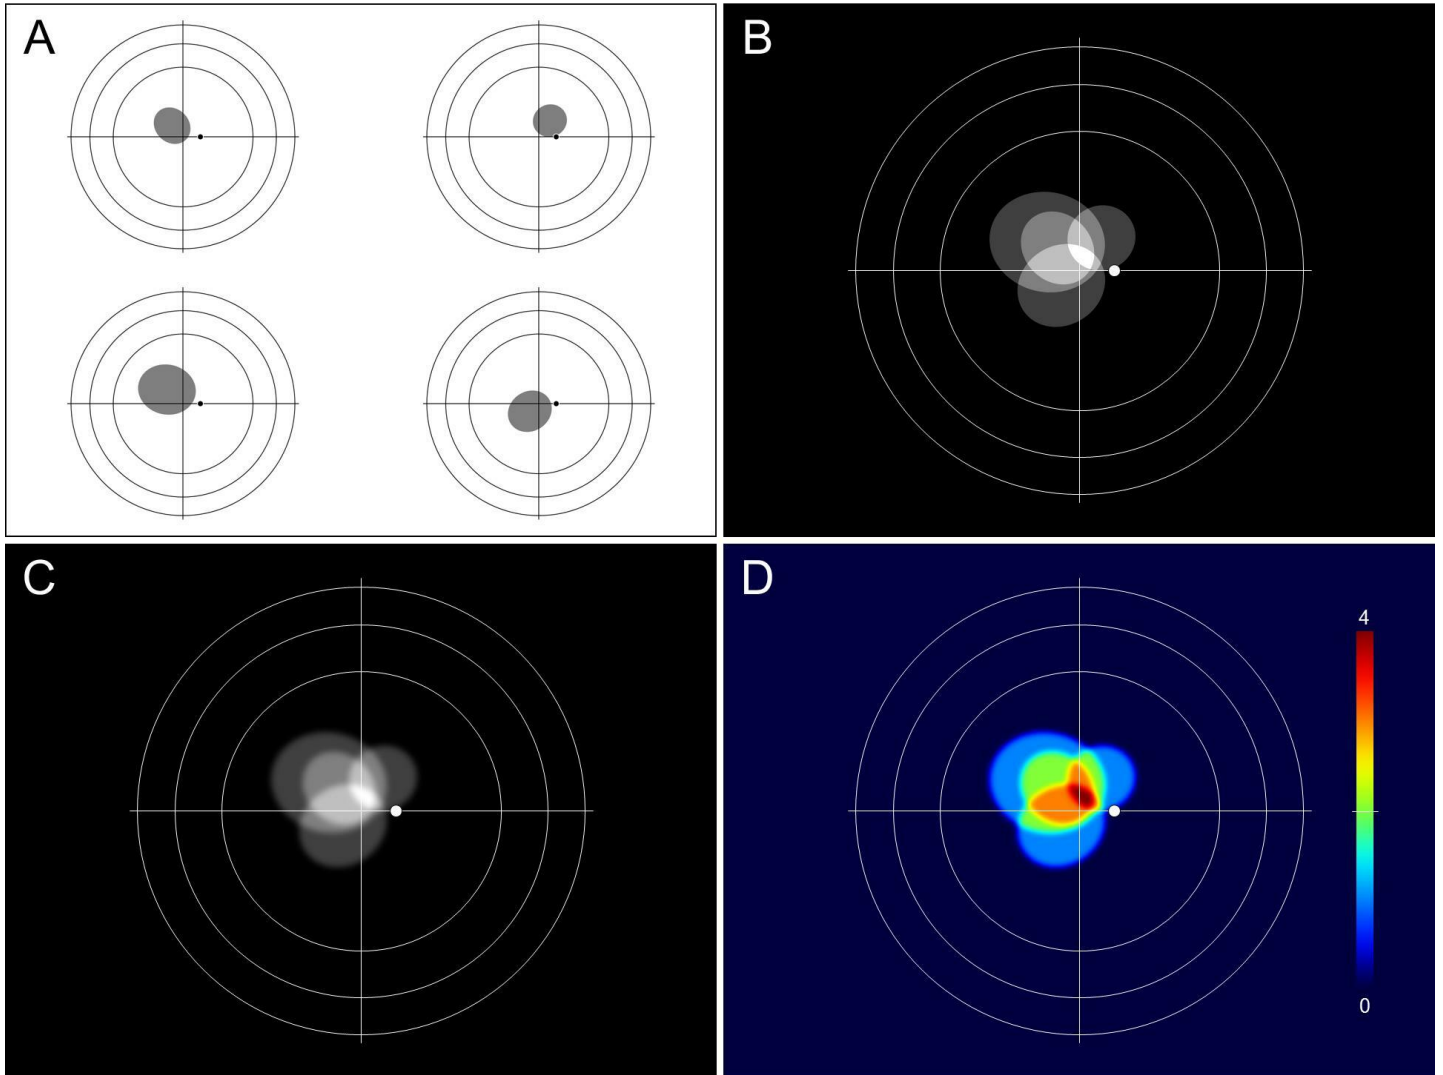

Supplement: bjophthalmol-2018-313388supp001.pdf [file bjophthalmol-2018-313388supp001.pdf]
